# Supplementary material for: Number neurons in the nidopallium of young domestic chicks
Source: PubMed Central journal article supplement — Proc Natl Acad Sci U S A. 2022 Aug 2;119(32):e2201039119. doi: 10.1073/pnas.2201039119 (PMC9371667; doi:10.1073/pnas.2201039119), 2022-08-02
Supplement: pnas.2201039119.sapp.pdf [file pnas.2201039119.sapp.pdf]

## 1 Supplementary information

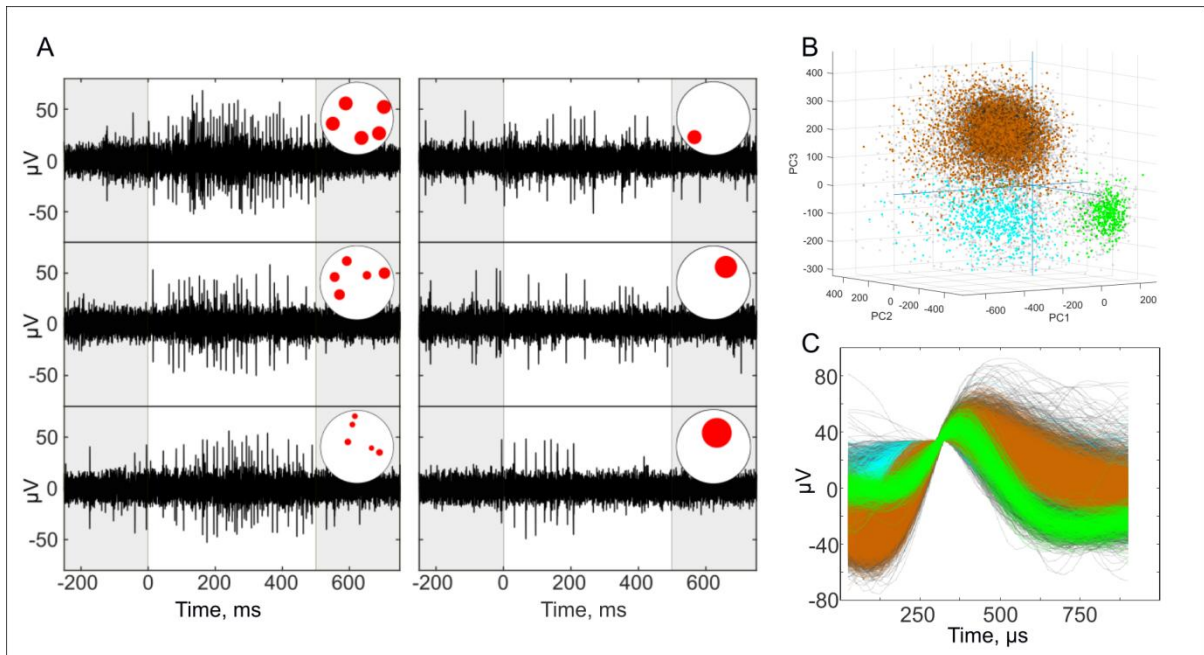

2

3 Figure S1. (A) Example of raw spike trains: electrical signal is shown after the high-  
4 pass filter was applied. Examples of single trials, representing neural response of the  
5 unit to numerosity 5 (left column), irrespective of the stimulus appearance (top:  
6 radius-fixed, middle: area-fixed, bottom: perimeter-fixed). Note the decreasing neural  
7 response to the numerosity 1 (right column). (B) The PCA clustering of the  
8 corresponding recording with waveforms of different units shown by different colours.  
9 The waveforms of the number-responsive unit are shown in orange, unsorted  
10 waveforms are shown in grey. (C) Spike waveforms of corresponding  
11 units isolated from the recording of one electrode.

12

13

14

15

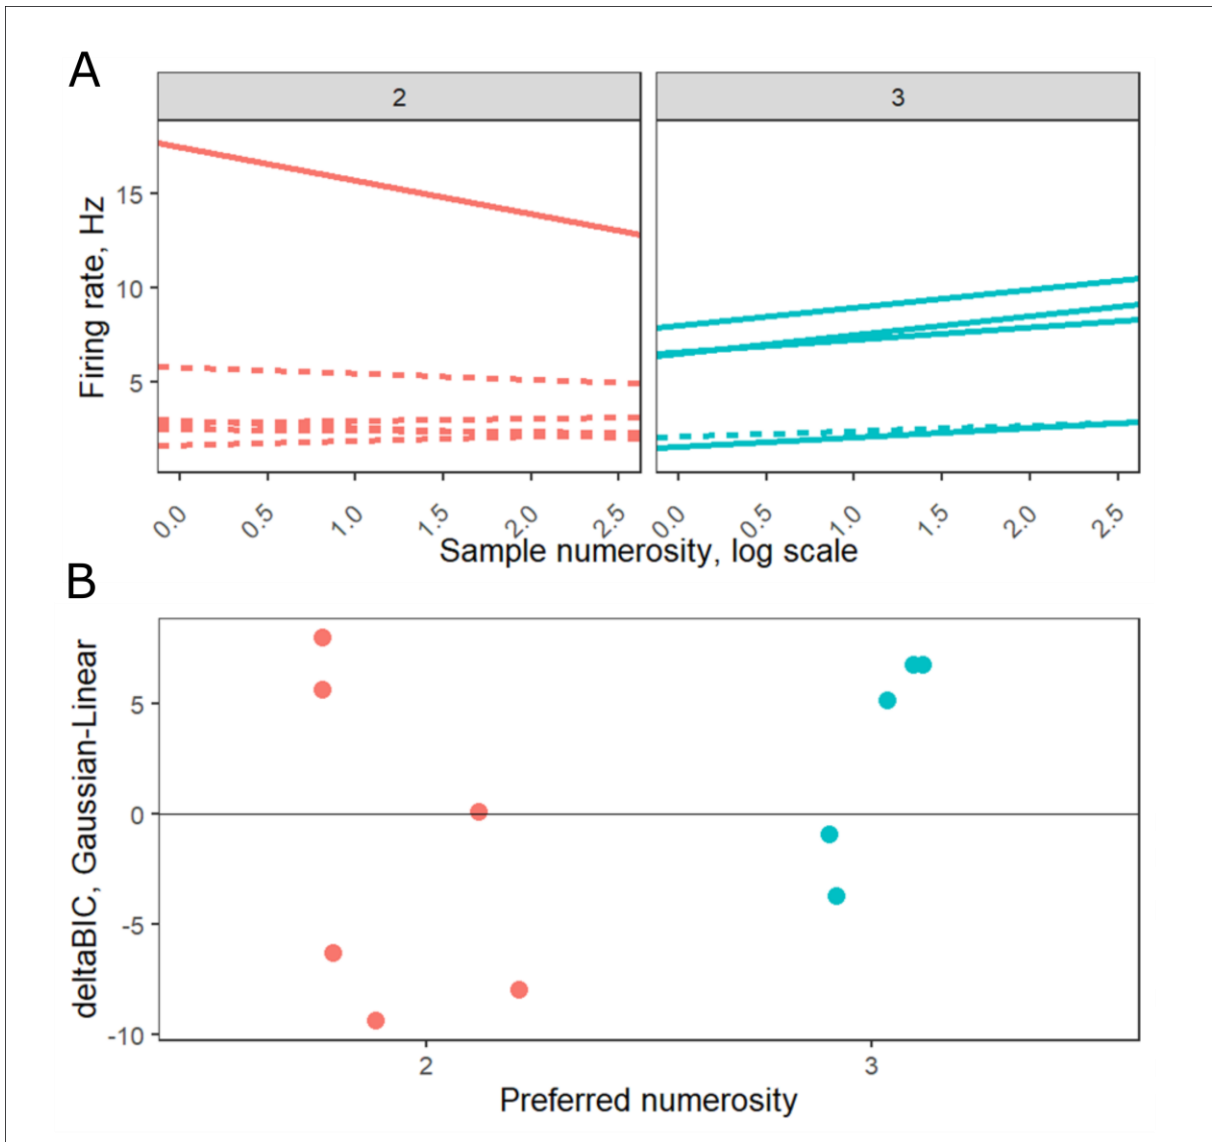

17

18 Figure S2. All numerosity-responsive neurons significantly ( $p < 0.01$ ) changed their  
19 firing rate in response to numerical stimuli, which was revealed by ANOVA with  
20 “numerosity” as a factor. If these neurons would be monotonically  
21 increasing/decreasing their firing rate with numerosity (according to the summation  
22 coding), we would expect their firing rate to be best explained by a linear model (the  
23 linear regression applied to the neural response of these neurons should be highly  
24 significant). This, however, is not the case for most neurons. (A) Linear regression  
25 lines applied to the raw neural responses of the neurons tuned to numerosity 2 (red)

26 and 3 (blue). Solid lines – significant ( $p < 0.01$ ) decrease/increase of the firing rate  
27 with numerosity; dashed lines – non-significant regression. Please note that out of 11  
28 number neurons, only 5 showed significant ( $p < 0.01$ ) decrease/increase of their firing  
29 rate with numerosity (solid lines). Out of these 5 cases, 4 belong to the neurons  
30 tuned to numerosity 3, which do have very broad and positively skewed tuning  
31 curves. Also note that among the 6 neurons that were tuned to numerosity 2, only 1  
32 neuron has a significant linear decrease in the firing rate. Thus, the majority of the  
33 data does not follow this prediction of the summation coding theory. (B)  $\Delta BIC$   
34 (difference between Bayesian information criterion of a Gaussian fit and the linear  
35 regression) is plotted for neurons preferentially responding to numerosity 2 (red) and  
36 3 (blue). If  $\Delta BIC$  is lower than 0, the BIC for the Gaussian fit is smaller than for the  
37 linear fit and, hence, the corresponding unit response is better described by a bell-  
38 shaped behaviour according to a labeled-line code hypothesis. This analysis  
39 revealed that only for 5 out of 11 neurons there is a strong preference for the linear  
40 fit (suggesting monotonic coding). Thus, also in this case, while some of the neurons  
41 in our datasets seem to follow the linear fit, supporting the monotonic coding, this  
42 does not apply to the entirety or even the majority of our neurons.

43

44

45

46

47

48

49 Table S1. Summary of the two-way ANOVA for every recorded unit. Unit: id of the  
50 recorded unit. Preferred numerosity: numerosity stimulus that elicited the strongest  
51 response in the corresponding unit. ANOVA results (F-statistics and p-value) are  
52 summarized for the factor “Stimulus type” (radius-fixed, area-fixed, perimeter-fixed),  
53 “Numerosity” (numerosity “one” to “five”), or interaction between them.

| Unit | Preferred numerosity | ANOVA (Firing rate ~ Stimulus type * Numerosity) |                            |                            |
|------|----------------------|--------------------------------------------------|----------------------------|----------------------------|
|      |                      | Numerosity                                       | Stimulus type              | Interaction                |
| 1    | num1                 | F(4,546)=4.0327, p = 0.003                       | F(2,546)=0.5228, p = 0.593 | F(8,546)=1.4242, p = 0.183 |
| 2    | num1                 | F(4,197)=3.5672, p = 0.008                       | F(2,197)=0.4656, p = 0.628 | F(8,197)=0.8763, p = 0.537 |
| 3    | num1                 | F(4,202)=4.0268, p = 0.004                       | F(2,202)=1.7732, p = 0.172 | F(8,202)=1.1967, p = 0.303 |
| 4    | num1                 | F(4,565)=4.2588, p = 0.002                       | F(2,565)=0.0012, p = 0.999 | F(8,565)=0.7852, p = 0.616 |
| 5    | num1                 | F(4,270)=5.3565, p = 0                           | F(2,270)=1.2038, p = 0.302 | F(8,270)=0.9519, p = 0.474 |
| 6    | num1                 | F(4,270)=5.4507, p = 0                           | F(2,270)=0.0475, p = 0.954 | F(8,270)=0.7056, p = 0.687 |
| 7    | num1                 | F(4,239)=3.7861, p = 0.005                       | F(2,239)=0.4114, p = 0.663 | F(8,239)=1.6597, p = 0.109 |
| 8    | num1                 | F(4,419)=4.9175, p = 0.001                       | F(2,419)=1.0111, p = 0.365 | F(8,419)=1.0988, p = 0.363 |
| 9    | num1                 | F(4,399)=7.4226, p = 0                           | F(2,399)=2.8675, p = 0.058 | F(8,399)=2.1769, p = 0.028 |
| 10   | num1                 | F(4,366)=4.2597, p = 0.002                       | F(2,366)=0.9588, p = 0.384 | F(8,366)=1.4233, p = 0.185 |
| 11   | num1                 | F(4,364)=6.4075, p = 0                           | F(2,364)=0.2249, p = 0.799 | F(8,364)=1.2606, p = 0.263 |
| 12   | num1                 | F(4,490)=3.9053, p = 0.004                       | F(2,490)=1.1902, p = 0.305 | F(8,490)=0.6286, p = 0.754 |
| 13   | num1                 | F(4,251)=5.7273, p = 0                           | F(2,251)=0.9275, p = 0.396 | F(8,251)=1.2411, p = 0.273 |
| 14   | num1                 | F(4,186)=3.5545, p = 0.008                       | F(2,186)=1.1998, p = 0.304 | F(8,186)=0.6334, p = 0.749 |
| 15   | num1                 | F(4,233)=4.4063, p = 0.002                       | F(2,233)=1.138, p = 0.322  | F(8,233)=0.3761, p = 0.933 |
| 16   | num1                 | F(4,316)=3.6533, p = 0.006                       | F(2,316)=1.4135, p = 0.245 | F(8,316)=0.8235, p = 0.582 |
| 17   | num2                 | F(4,177)=4.5348, p = 0.002                       | F(2,177)=0.2742, p = 0.761 | F(8,177)=0.6772, p = 0.711 |
| 18   | num2                 | F(4,176)=4.1623, p = 0.003                       | F(2,176)=0.8853, p = 0.414 | F(8,176)=0.8814, p = 0.533 |
| 19   | num2                 | F(4,147)=3.6633, p = 0.007                       | F(2,147)=0.929, p = 0.397  | F(8,147)=0.5183, p = 0.841 |
| 20   | num2                 | F(4,145)=3.7461, p = 0.006                       | F(2,145)=0.514, p = 0.599  | F(8,145)=0.5375, p = 0.827 |
| 21   | num2                 | F(4,298)=3.4934, p = 0.008                       | F(2,298)=0.7184, p = 0.488 | F(8,298)=1.0979, p = 0.364 |
| 22   | num2                 | F(4,253)=3.5881, p = 0.007                       | F(2,253)=0.2355, p = 0.79  | F(8,253)=0.454, p = 0.887  |
| 23   | num3                 | F(4,213)=3.4856, p = 0.009                       | F(2,213)=0.6473, p = 0.524 | F(8,213)=0.5014, p = 0.854 |
| 24   | num3                 | F(4,184)=3.6183, p = 0.007                       | F(2,184)=0.5629, p = 0.571 | F(8,184)=0.6608, p = 0.725 |

|    |      |                            |                            |                            |
|----|------|----------------------------|----------------------------|----------------------------|
| 25 | num3 | F(4,472)=5.1242, p = 0     | F(2,472)=2.8061, p = 0.062 | F(8,472)=0.809, p = 0.595  |
| 26 | num3 | F(4,410)=3.7563, p = 0.005 | F(2,410)=4.5228, p = 0.011 | F(8,410)=1.3146, p = 0.233 |
| 27 | num3 | F(4,496)=5.8789, p = 0     | F(2,496)=0.1179, p = 0.889 | F(8,496)=1.4538, p = 0.173 |
| 28 | num4 | F(4,176)=3.926, p = 0.004  | F(2,176)=1.1196, p = 0.329 | F(8,176)=0.6298, p = 0.752 |
| 29 | num4 | F(4,178)=3.9175, p = 0.004 | F(2,178)=0.4244, p = 0.655 | F(8,178)=0.6897, p = 0.7   |
| 30 | num4 | F(4,267)=4.5852, p = 0.001 | F(2,267)=0.6043, p = 0.547 | F(8,267)=0.8609, p = 0.55  |
| 31 | num4 | F(4,371)=3.6503, p = 0.006 | F(2,371)=1.9928, p = 0.138 | F(8,371)=0.5894, p = 0.787 |
| 32 | num4 | F(4,430)=3.4615, p = 0.008 | F(2,430)=0.3739, p = 0.688 | F(8,430)=0.513, p = 0.847  |
| 33 | num4 | F(4,420)=4.4972, p = 0.001 | F(2,420)=1.1432, p = 0.32  | F(8,420)=1.1135, p = 0.353 |
| 34 | num4 | F(4,459)=6.5488, p = 0     | F(2,459)=2.8234, p = 0.06  | F(8,459)=1.3186, p = 0.232 |
| 35 | num4 | F(4,333)=3.4399, p = 0.009 | F(2,333)=3.3226, p = 0.037 | F(8,333)=1.5331, p = 0.145 |
| 36 | num4 | F(4,308)=4.2385, p = 0.002 | F(2,308)=0.1141, p = 0.892 | F(8,308)=0.9124, p = 0.506 |
| 37 | num5 | F(4,323)=5.0184, p = 0.001 | F(2,323)=1.9782, p = 0.14  | F(8,323)=0.3722, p = 0.935 |
| 38 | num5 | F(4,188)=3.5707, p = 0.008 | F(2,188)=1.1655, p = 0.314 | F(8,188)=0.5456, p = 0.821 |
| 39 | num5 | F(4,307)=5.1489, p = 0     | F(2,307)=0.0322, p = 0.968 | F(8,307)=0.4935, p = 0.861 |
| 40 | num5 | F(4,260)=5.1953, p = 0     | F(2,260)=0.945, p = 0.39   | F(8,260)=0.682, p = 0.707  |
| 41 | num5 | F(4,234)=4.65, p = 0.001   | F(2,234)=0.7971, p = 0.452 | F(8,234)=0.8709, p = 0.542 |
| 42 | num5 | F(4,232)=3.7216, p = 0.006 | F(2,232)=0.0802, p = 0.923 | F(8,232)=1.3969, p = 0.199 |
| 43 | num5 | F(4,484)=3.6509, p = 0.006 | F(2,484)=0.1205, p = 0.887 | F(8,484)=0.7686, p = 0.631 |
| 44 | num5 | F(4,458)=12.8202, p = 0    | F(2,458)=0.7574, p = 0.469 | F(8,458)=0.4219, p = 0.908 |
| 45 | num5 | F(4,192)=4.4432, p = 0.002 | F(2,192)=2.0198, p = 0.135 | F(8,192)=1.8229, p = 0.075 |
| 46 | num5 | F(4,415)=3.8044, p = 0.005 | F(2,415)=1.618, p = 0.2    | F(8,415)=0.5316, p = 0.832 |
| 47 | num5 | F(4,685)=14.1207, p = 0    | F(2,685)=1.9687, p = 0.141 | F(8,685)=1.4958, p = 0.156 |
| 48 | num5 | F(4,371)=6.7422, p = 0     | F(2,371)=0.6683, p = 0.513 | F(8,371)=1.6257, p = 0.115 |
| 49 | num5 | F(4,359)=4.1619, p = 0.003 | F(2,359)=0.1355, p = 0.873 | F(8,359)=0.4252, p = 0.906 |
| 50 | num5 | F(4,355)=13.4938, p = 0    | F(2,355)=1.832, p = 0.162  | F(8,355)=0.3219, p = 0.958 |
| 51 | num5 | F(4,354)=6.4972, p = 0     | F(2,354)=0.6433, p = 0.526 | F(8,354)=0.9821, p = 0.45  |
| 52 | num5 | F(4,288)=3.3897, p = 0.01  | F(2,288)=2.1069, p = 0.123 | F(8,288)=1.2445, p = 0.273 |
| 53 | num5 | F(4,460)=5.4865, p = 0     | F(2,460)=1.4027, p = 0.247 | F(8,460)=0.7622, p = 0.636 |

54

55

56

57 Table S2. The post hoc analysis of the two-way ANOVA based on the Tukey-Kramer  
 58 method summarising p-values for every pairwise comparison between the most-  
 59 preferred and other numerosities. Significant p-values <0.05 are highlighted in bold.

| Unit | Preferred numerosity | Post hoc analysis, p-value |              |              |              |              |
|------|----------------------|----------------------------|--------------|--------------|--------------|--------------|
|      |                      | num1                       | num2         | num3         | num4         | num5         |
| 1    | num1                 |                            | <b>0.016</b> | <b>0.022</b> | <b>0.019</b> | <b>0.007</b> |
| 2    | num1                 |                            | 0.081        | <b>0.019</b> | <b>0.011</b> | <b>0.021</b> |
| 3    | num1                 |                            | 0.988        | 0.903        | 0.303        | <b>0.003</b> |
| 4    | num1                 |                            | 0.974        | 0.315        | <b>0.002</b> | 0.209        |
| 5    | num1                 |                            | 0.890        | 0.650        | <b>0.000</b> | <b>0.027</b> |
| 6    | num1                 |                            | 0.176        | 0.063        | <b>0.001</b> | <b>0.001</b> |
| 7    | num1                 |                            | <b>0.035</b> | <b>0.048</b> | <b>0.006</b> | <b>0.020</b> |
| 8    | num1                 |                            | <b>0.031</b> | <b>0.001</b> | <b>0.001</b> | <b>0.023</b> |
| 9    | num1                 |                            | 0.788        | 0.174        | <b>0.000</b> | <b>0.000</b> |
| 10   | num1                 |                            | 0.465        | <b>0.002</b> | <b>0.009</b> | 0.169        |
| 11   | num1                 |                            | <b>0.033</b> | <b>0.000</b> | <b>0.000</b> | <b>0.001</b> |
| 12   | num1                 |                            | <b>0.036</b> | <b>0.013</b> | 0.090        | <b>0.004</b> |
| 13   | num1                 |                            | 0.221        | 0.120        | <b>0.001</b> | <b>0.000</b> |
| 14   | num1                 |                            | 0.147        | 0.142        | 0.061        | <b>0.004</b> |
| 15   | num1                 |                            | <b>0.031</b> | <b>0.002</b> | 0.084        | <b>0.004</b> |
| 16   | num1                 |                            | 0.304        | <b>0.048</b> | <b>0.008</b> | <b>0.014</b> |
| 17   | num2                 | 0.447                      |              | 0.986        | 0.362        | <b>0.001</b> |
| 18   | num2                 | <b>0.001</b>               |              | <b>0.027</b> | <b>0.025</b> | 0.206        |
| 19   | num2                 | <b>0.023</b>               |              | 0.945        | 0.065        | 0.063        |
| 20   | num2                 | <b>0.013</b>               |              | <b>0.017</b> | 0.826        | 0.608        |
| 21   | num2                 | 0.973                      |              | 0.181        | 0.125        | <b>0.011</b> |
| 22   | num2                 | <b>0.040</b>               |              | 0.312        | 0.075        | <b>0.004</b> |
| 23   | num3                 | <b>0.005</b>               | 0.807        |              | 0.760        | 0.123        |
| 24   | num3                 | <b>0.006</b>               | 0.094        |              | 0.504        | 0.899        |
| 25   | num3                 | <b>0.001</b>               | 0.913        |              | 0.998        | 0.796        |
| 26   | num3                 | <b>0.005</b>               | 0.059        |              | 0.370        | 0.857        |
| 27   | num3                 | <b>0.000</b>               | <b>0.024</b> |              | 0.798        | 0.683        |
| 28   | num4                 | <b>0.003</b>               | 0.282        | 0.120        |              | <b>0.016</b> |
| 29   | num4                 | <b>0.020</b>               | 0.051        | 0.213        |              | 0.999        |
| 30   | num4                 | 0.710                      | <b>0.001</b> | <b>0.028</b> |              | 0.103        |
| 31   | num4                 | <b>0.007</b>               | 0.369        | 0.813        |              | 0.998        |
| 32   | num4                 | 0.059                      | 0.059        | 0.936        |              | 0.999        |
| 33   | num4                 | 0.065                      | <b>0.007</b> | 0.864        |              | 1.000        |
| 34   | num4                 | <b>0.000</b>               | 0.092        | 0.419        |              | 0.968        |
| 35   | num4                 | <b>0.004</b>               | 0.628        | 0.616        |              | 0.850        |
| 36   | num4                 | <b>0.003</b>               | 0.194        | 0.981        |              | 0.928        |
| 37   | num5                 | <b>0.002</b>               | <b>0.002</b> | <b>0.007</b> | 0.054        |              |
| 38   | num5                 | <b>0.022</b>               | 0.287        | 0.995        | 0.999        |              |
| 39   | num5                 | <b>0.000</b>               | 0.148        | 0.653        | 0.803        |              |

|    |      |              |              |              |              |
|----|------|--------------|--------------|--------------|--------------|
| 40 | num5 | <b>0.000</b> | <b>0.026</b> | 0.525        | 0.214        |
| 41 | num5 | <b>0.001</b> | <b>0.021</b> | 0.226        | <b>0.012</b> |
| 42 | num5 | <b>0.008</b> | 0.150        | <b>0.010</b> | 0.431        |
| 43 | num5 | <b>0.004</b> | 0.097        | 0.111        | 0.725        |
| 44 | num5 | <b>0.000</b> | <b>0.000</b> | 0.750        | 0.851        |
| 45 | num5 | <b>0.015</b> | <b>0.032</b> | <b>0.001</b> | 0.080        |
| 46 | num5 | 0.070        | <b>0.002</b> | 0.428        | 0.069        |
| 47 | num5 | <b>0.000</b> | <b>0.000</b> | <b>0.016</b> | 0.868        |
| 48 | num5 | <b>0.000</b> | <b>0.003</b> | 0.251        | 0.901        |
| 49 | num5 | <b>0.003</b> | 0.394        | 0.940        | 0.997        |
| 50 | num5 | <b>0.000</b> | <b>0.000</b> | <b>0.034</b> | 0.078        |
| 51 | num5 | <b>0.000</b> | <b>0.009</b> | <b>0.014</b> | 0.801        |
| 52 | num5 | 0.074        | <b>0.023</b> | 0.988        | 0.798        |
| 53 | num5 | <b>0.006</b> | <b>0.004</b> | 0.276        | 0.998        |

60

61

62 Video S1

63 Examples of trials showing raw neural responses to numerosities 1 and 5. The firing  
64 rate increases in response to the most preferred numerosity 5 compared to the least  
65 preferred numerosity 1. The video-recordings of the corresponding trials show that  
66 the animal is observing the stimuli (shown on the right) with the contralateral (left)  
67 eye or with both eyes. The video is slowed down to 60% of the original speed.
